# Supplementary material
Source: ML conference proceedings conference paper supplement (https://openreview.net/forum?id=EukID7GvBy)

# Bipartite Graph of Questions and Answers

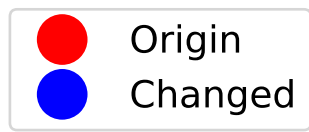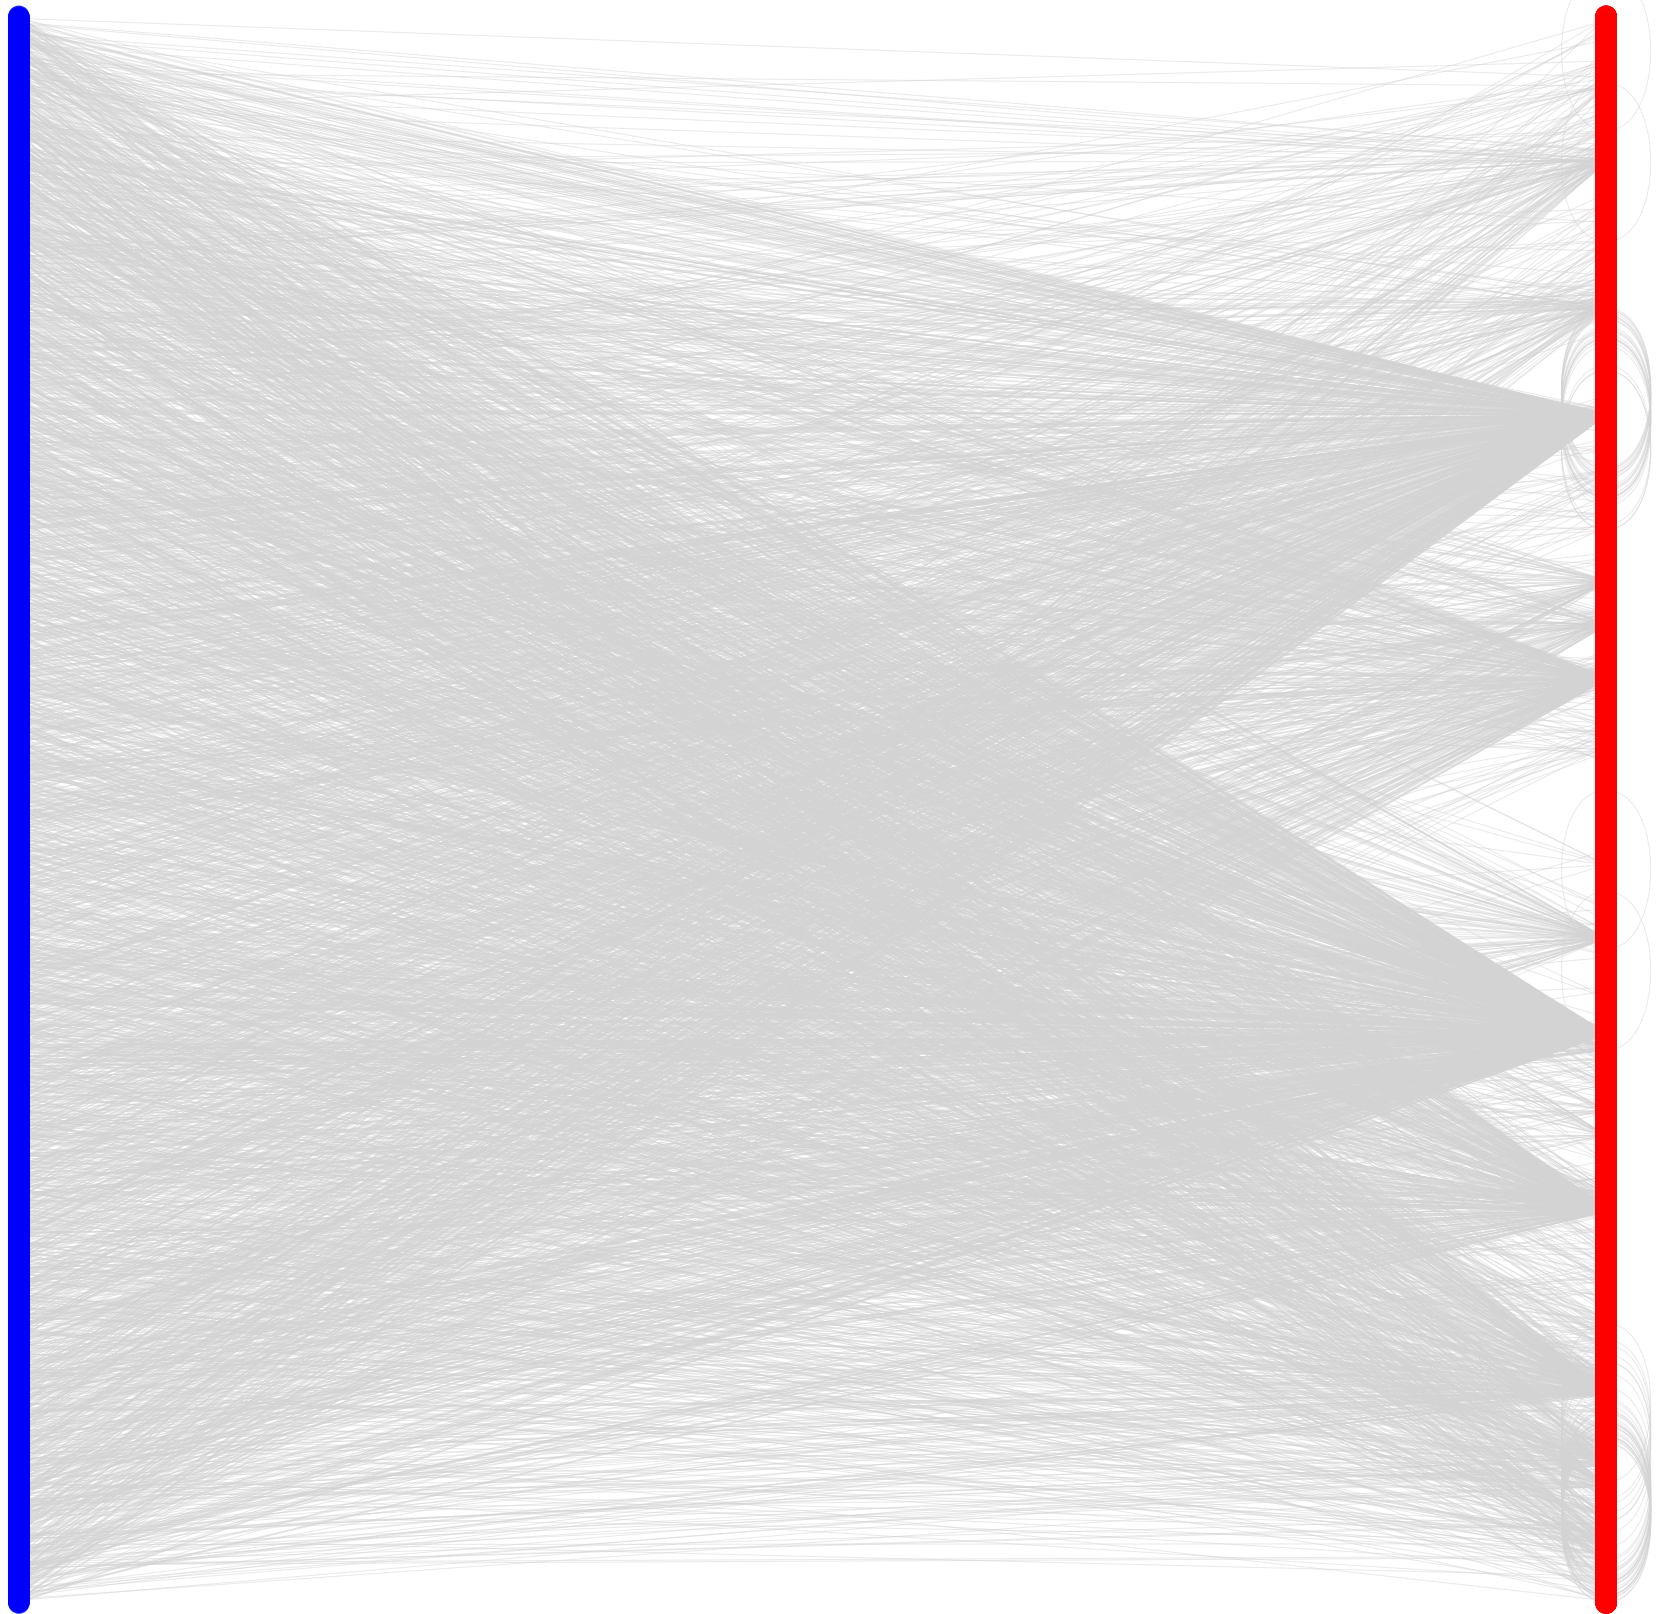

Supplement: supplementary_material [file attachment]
